# Supplementary material for: UVR8 disrupts stabilisation of PIF5 by COP1 to inhibit plant stem elongation in sunlight
Source: PubMed Central journal article supplement (PMC6764944; doi:10.1038/s41467-019-12369-1), 2019-09-27
Supplement: 41467_2019_12369_MOESM1_ESM.pdf [file 41467_2019_12369_MOESM1_ESM.pdf]

**a**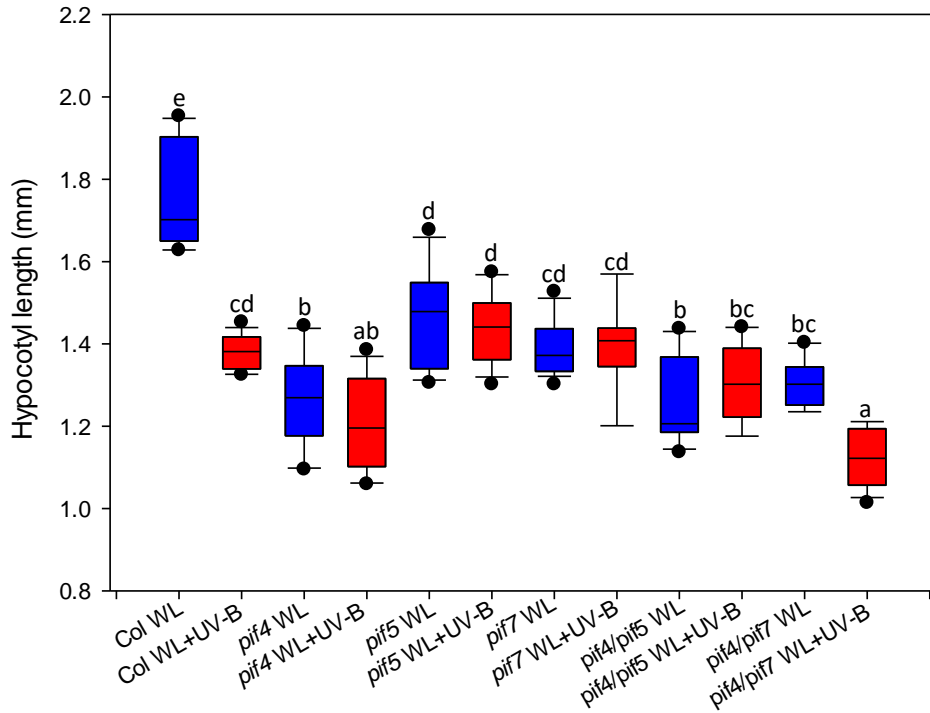**b**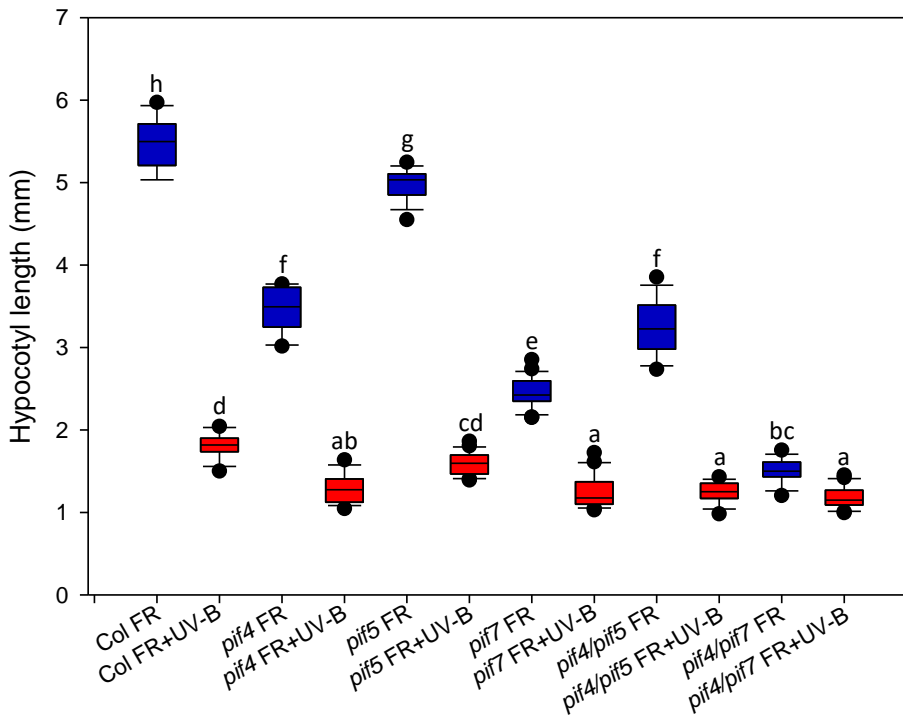**Supplementary Figure 1. UV-B inhibits PIF-mediated hypocotyl elongation.**

Hypocotyl length measurements of Col and *pif* mutant seedlings grown for 3 days in continuous high R:FR light before transfer to (a) high R:FR (WL) or (b) low R:FR (FR) for 4 days  $\pm$  UV-B. Boxes represent 25<sup>th</sup> to 75<sup>th</sup> percentile. Bars show the median and whiskers represent the 10<sup>th</sup> and 90<sup>th</sup> percentile outlines. Different letters indicate statistically significant differences between means (Tukey's HSD,  $P < 0.05$ ,  $n \geq 10$ ). Source data are provided as a source data file.

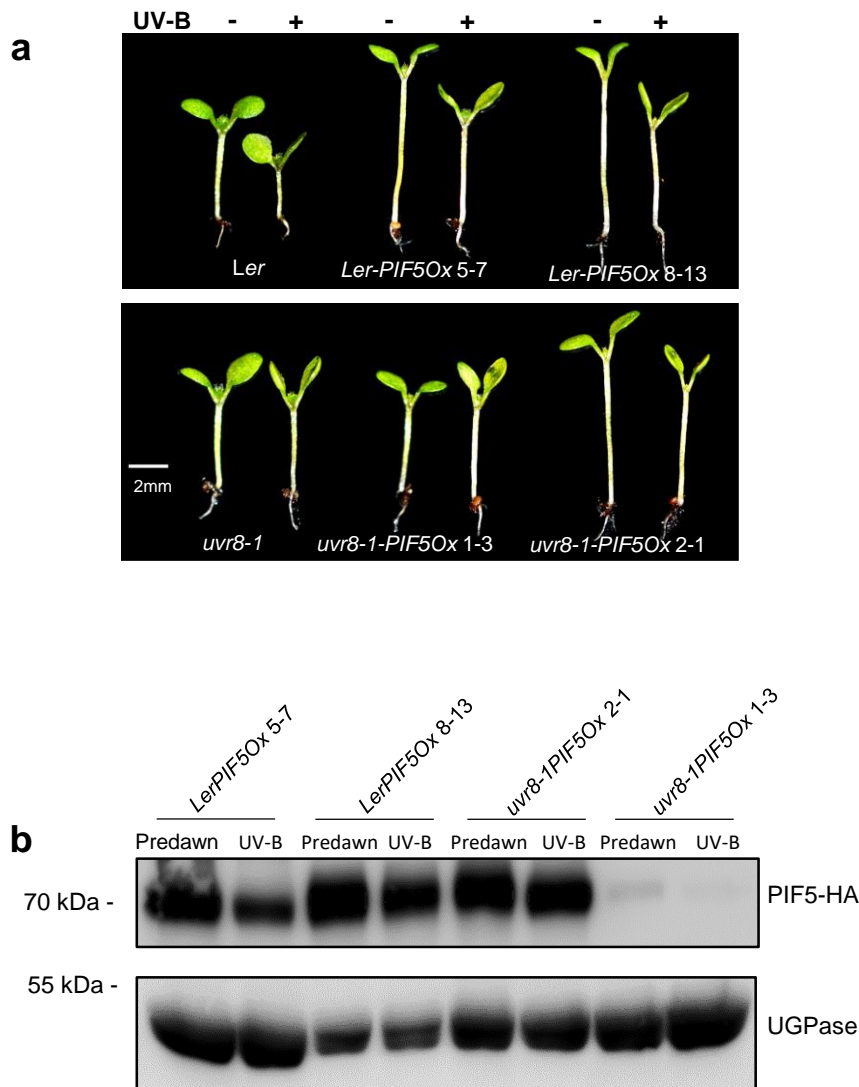

**Supplementary Figure 2.** Selection of *35S:PIF5-HA* over-expressing lines

**a)** Two independent *35S:PIF5-HA* lines in *Ler* and *uvr8-1* backgrounds were screened for hypocotyl length in high R:FR ± UV-B. Images show representative seedlings of *Ler*, *uvr8-1*, *LerPIF5Ox* and *uvr8-1PIF5Ox* grown for 3 days in continuous high R:FR before transfer to ± UV-B conditions for 4 days. **b)** PIF5 protein abundance was analysed in *35S:PIF5-HA* lines. Total protein was extracted from 10 day-old seedlings harvested pre-dawn and following a 2 h dawn treatment of white light supplemented with UV-B. Immunoblots were probed with an anti-HA antibody. UGPase was used as a loading control. *LerPIF5Ox5-7* and *uvr8-1PIF5Ox 2-1* lines showed a similar level of PIF5-HA and were used for further study. Source data are provided as a source data file.

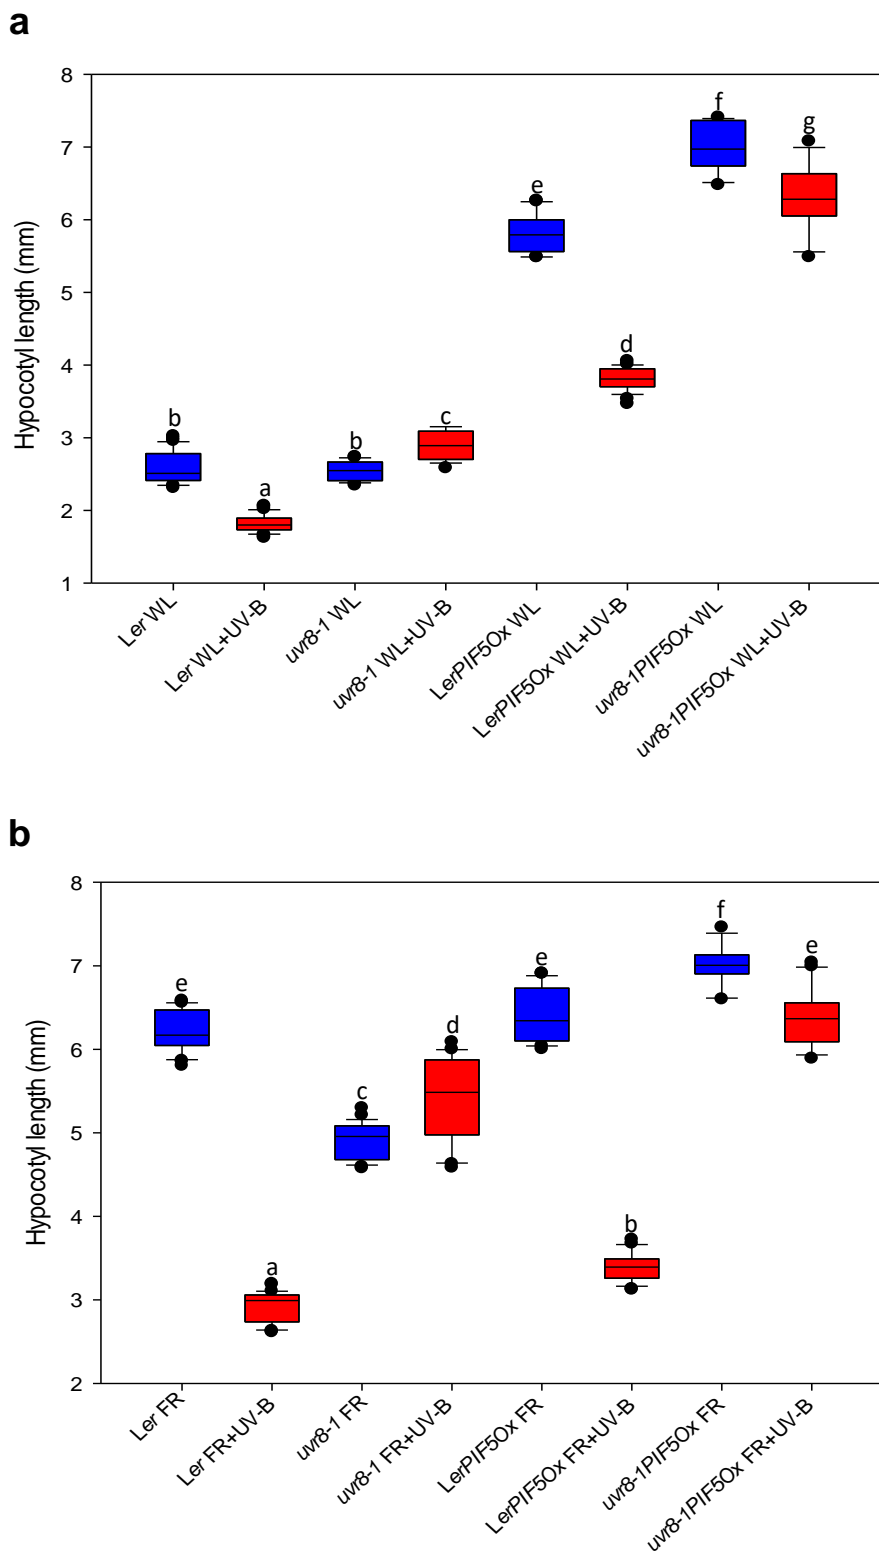

**Supplementary Figure 3.** UV-B perceived by UVR8 inhibits PIF5-mediated hypocotyl elongation in 16 h light/8 h dark photoperiods.

Hypocotyl length measurements of *Ler*, *uvr8-1*, *LerPIF5Ox* and *uvr8-1PIF5Ox* seedlings grown for 3 days before transfer to **(a)** high R:FR (WL) or **(b)** low R:FR (FR) for 4 days  $\pm$  UV-B. Boxes represent 25<sup>th</sup> to 75<sup>th</sup> percentile. Bars show the median and whiskers represent the 10<sup>th</sup> and 90<sup>th</sup> percentile outlines. Different letters indicate statistically significant differences between means (Tukey's HSD,  $P < 0.05$ ,  $n \geq 14$ ). Source data are provided as a source data file.

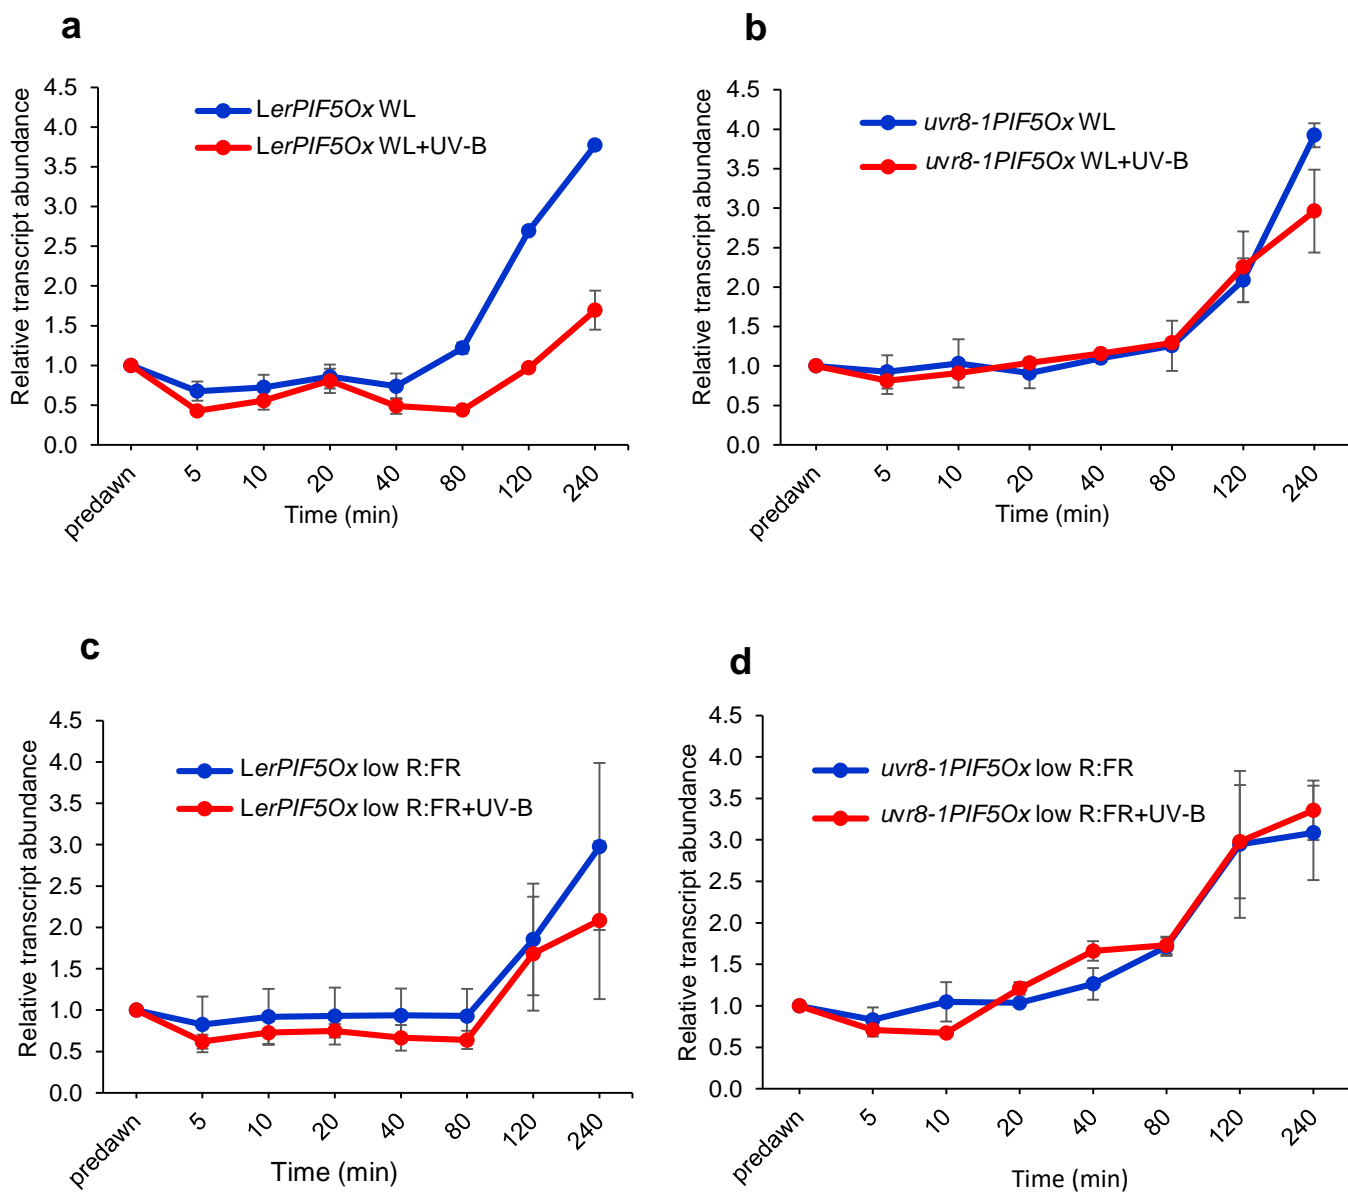

**Supplementary Figure 4.** UV-B perceived by UVR8 decreases *PIF5* transcript abundance in prolonged high R:FR.

**a)** Relative *PIF5* transcript in *LerPIF5Ox* and **b)** *uvr8-1PIF5Ox* under high R:FR ± UV-B. **c)** Relative *PIF5* transcript in *LerPIF5Ox* and **d)** *uvr8-1PIF5Ox* under low R:FR ± UV-B. Seedlings were grown for 10 days in 16 h light/ 8 h dark cycles before transfer at dawn to different light conditions. Data represent means of 2 independent biological repeats. Bars represent s.e.m. Source data are provided as a source data file.

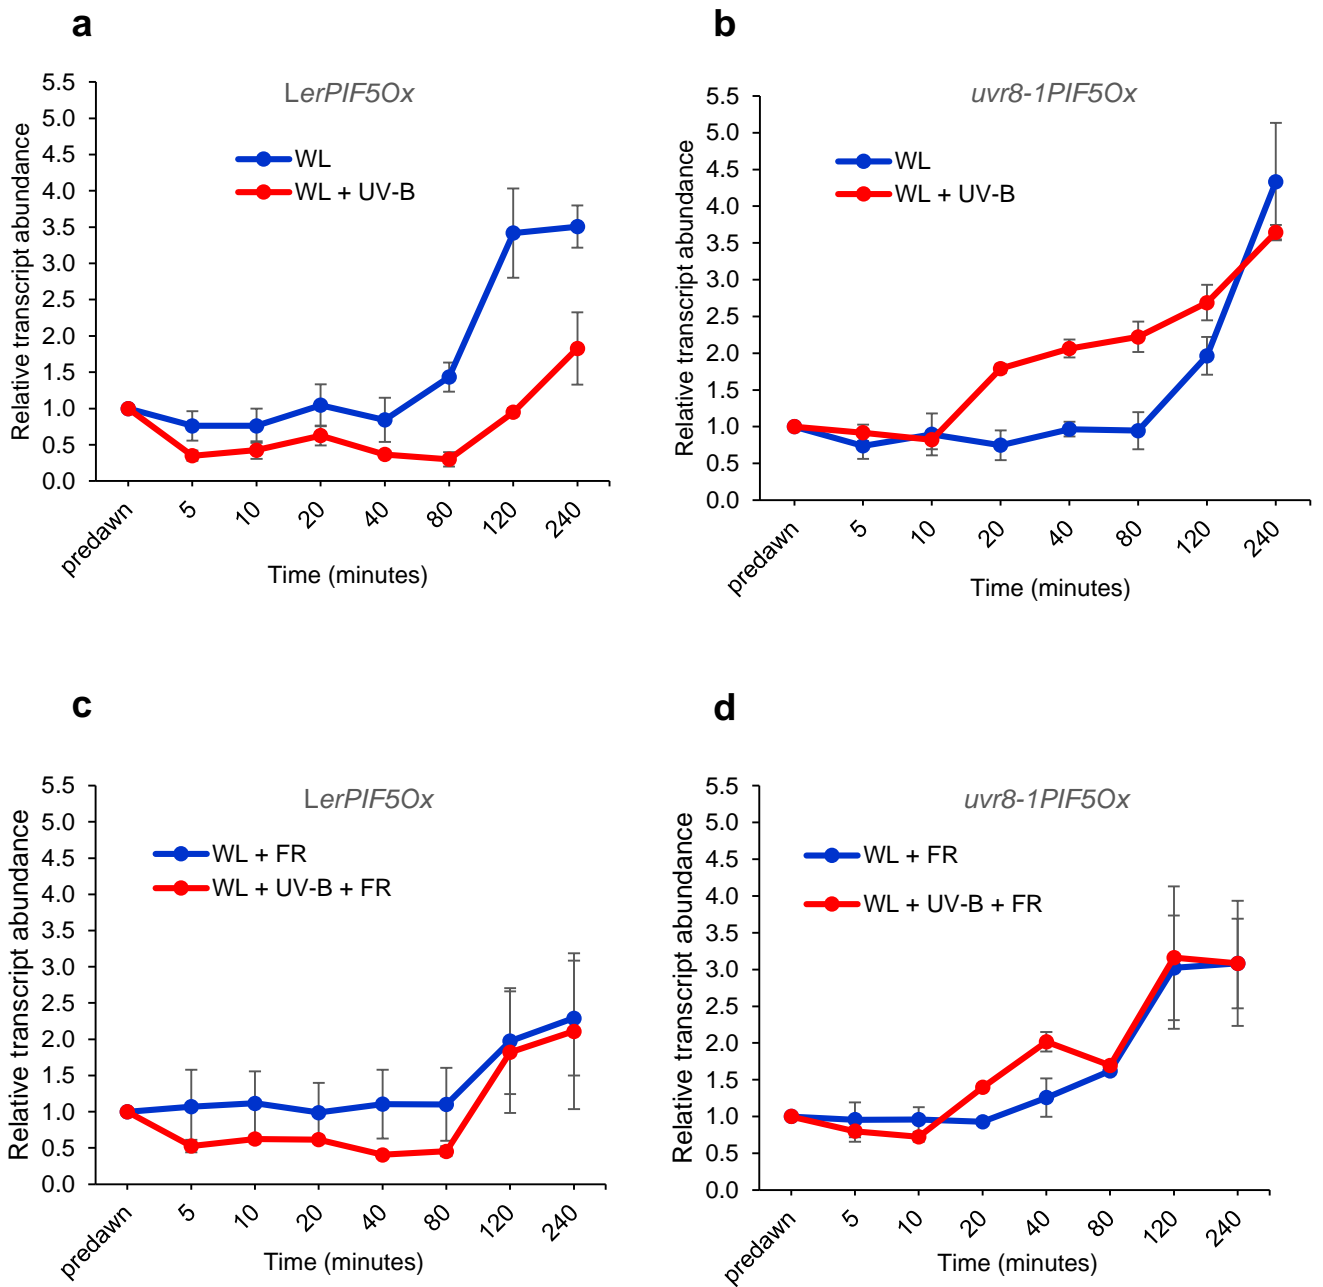

**Supplementary Figure 5.** UV-B perceived by UVR8 decreases *PIF5-HA* transcript abundance in prolonged high R:FR.

a) Relative *PIF5* transcript in *LerPIF5Ox* and b) *uvr8-1PIF5Ox* under high R:FR ± UV-B. c) Relative *PIF5* transcript in *LerPIF5Ox* and d) *uvr8-1PIF5Ox* under low R:FR ± UV-B. Seedlings were grown for 10 days in 16 h light/ 8 h dark cycles before transfer at dawn to different light conditions. Data represent means of 2 independent biological repeats. Bars represent s.e.m. Source data are provided as a source data file.

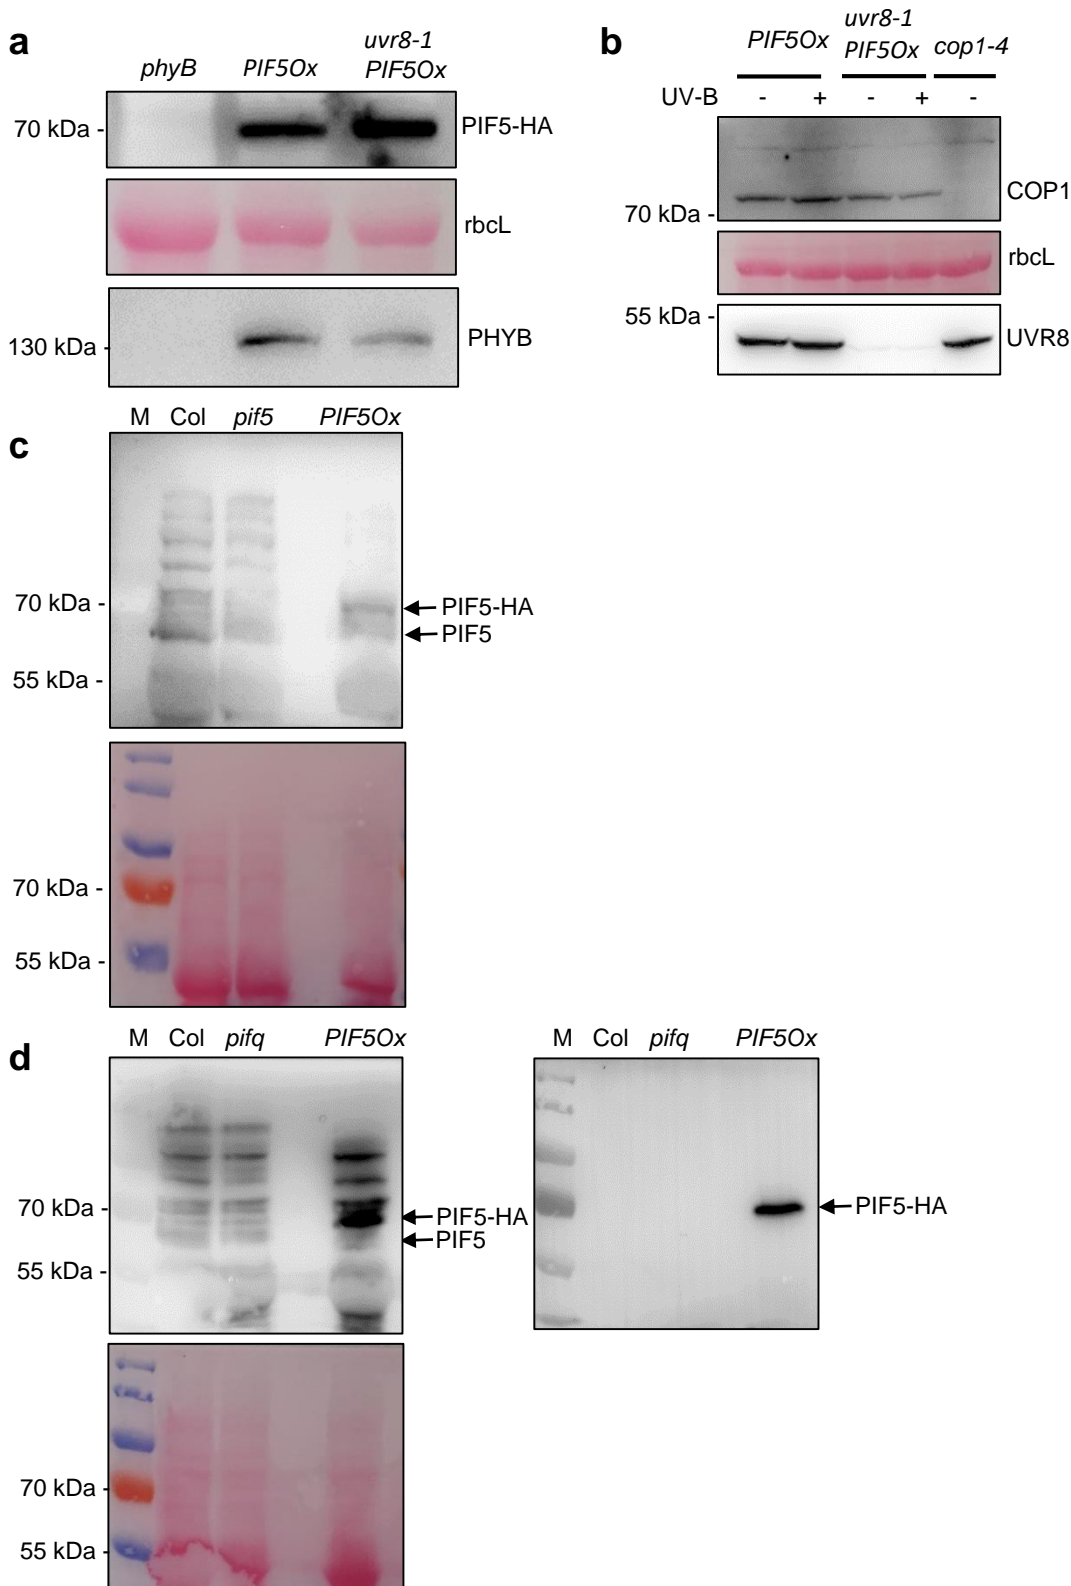

**Supplementary Figure 6.** COP1, UVR8, PHYB and PIF5 antibody controls

a) *phyB*, *LerPIF5Ox* (5-7), *uvr8-1PIF5Ox* (2-1) seedlings were grown for 10 days in 16 h light/ 8 h dark cycles before transfer at dawn to WL ± UV-B for 1 h. PIF5 and PHYB were detected with anti-HA and anti-PHYB antibodies, respectively. b) *LerPIF5Ox* (5-7), *uvr8-1PIF5Ox* (2-1) and *cop1-4* seedlings were grown as in (a). COP1 and UVR8 were detected with anti-COP1 and anti-UVR8 antibodies, respectively. c) Col, *pif5* and *PIF5Ox* seedlings were grown in the dark for 7 days and harvested at predawn on day 8. PIF5-HA and PIF5 were detected with anti-HA and anti-PIF5 antibodies, respectively. M- marker. Ponceau staining of Rubisco large subunit (*rbcl*) was used as a loading control. d) Blot produced as in (c) with *pifq* replacing *pif5* (left). This was reprobed with anti-HA antibody (right). Top arrow denotes PIF5-HA and bottom arrow denote PIF5. Source data are provided as a source data file.

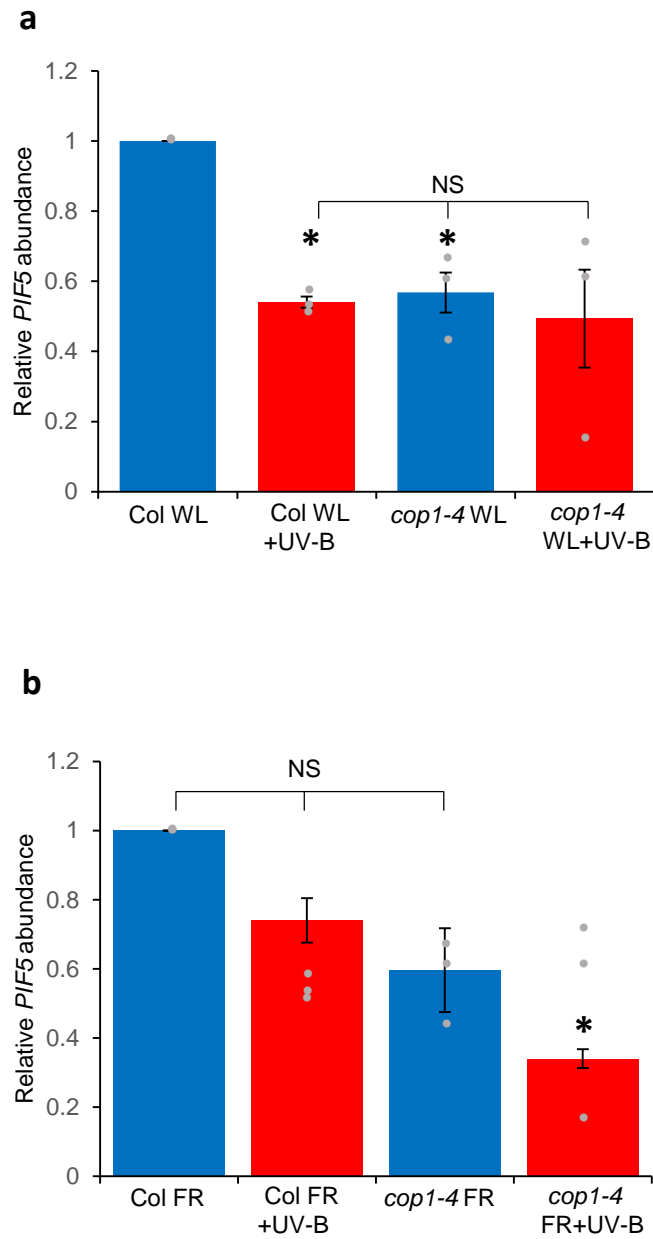

**Supplementary Figure 7.** COP1 promotes *PIF5* transcript accumulation in high R:FR

Relative *PIF5* transcript abundance in Col and *cop1-4* seedlings grown in (a) high R:FR ± UV-B and b) low R:FR ± UV-B. Seedlings were grown for 10 days in 16 h light/ 8 h dark cycles before transfer at dawn to different light conditions for 2 h. Data represent mean values from 3 biological repeats. Bars represent s.e.m. Student's t-tests were performed on Log2 transformed values ( $p < 0.05$ ), \*represents significant decrease in transcript abundance when compared to Col WL (a) or Col FR (b) controls. NS = No significant difference. Source data are provided as a source data file.

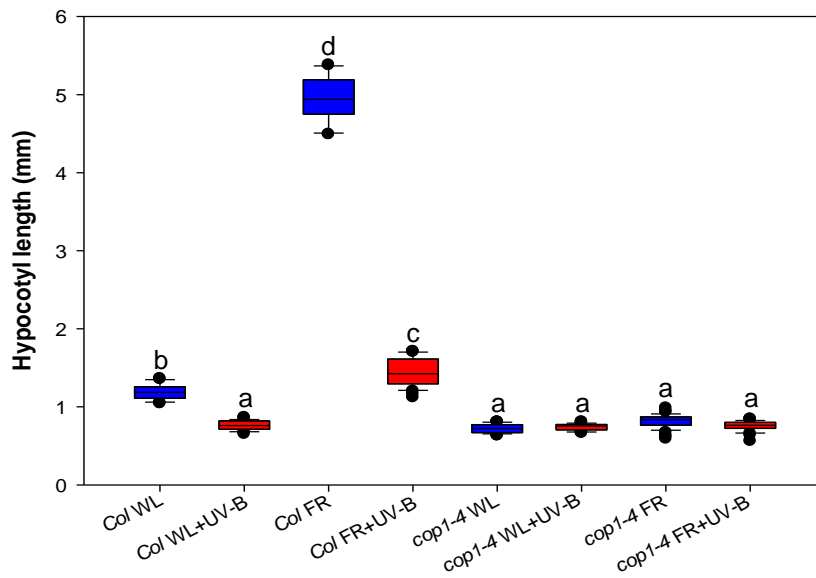

**Supplementary Figure 8.** *cop1* mutants display no shade avoidance.

Hypocotyl length measurements of Col and *cop1-4* mutant seedlings grown for 3 days in continuous high R:FR light before transfer to high R:FR (WL) or low R:FR (FR) for 4 days  $\pm$  UV-B. Boxes represent 25<sup>th</sup> to 75<sup>th</sup> percentile. Bars show the median and whiskers represent the 10<sup>th</sup> and 90<sup>th</sup> percentile outlines. Different letters indicate statistically significant differences between means (Tukey's HSD,  $P < 0.05$ ,  $n \geq 29$ ). Source data are provided as a source data file.



| <b>Primer</b>            | <b>Sequence</b>            |
|--------------------------|----------------------------|
| <i>PIF5</i> qPCR Forward | CAGATGGCTATGCAAAGTCAGATGC  |
| <i>PIF5</i> qPCR Reverse | AGATTTGGTTCTGTGCTTGGAGCTG  |
| HA Tag Reverse           | GAACGTCGTATGGGTAGTCGACGGAT |
| <i>ACTIN2</i> Forward    | TCAGATGCCCAGAAGTGTTGTTCC   |
| <i>ACTIN2</i> Reverse    | CCGTACAGATCCTTCCTGATATCC   |

**Supplementary Table 1.** List of primers used for qPCR
